# Supplementary material for: β-Cyclodextrin protected gold nanoparticle based cotton swabs as an effective candidate for specific sensing of trace levels of cyanide
Source: Royal Society of Chemistry journal article supplement (doi:10.1039/c8ay02013b), 2018-11-20
Supplement: c8ay02013b1.pdf [file c8ay02013b1.pdf]

## **Electronic supplementary information**

**$\beta$ -cyclodextrin protected gold nanoparticles based cotton swabs as an effective candidates for specific sensing of trace level of cyanide**

R. Rajamanikandan and M. Ilanchelian\*

Department of Chemistry,

Bharathiar University, Coimbatore - 641046, Tamil Nadu, India

\*Corresponding author: E-mail: [chelian73@yahoo.com](mailto:chelian73@yahoo.com),

Tel: +91 422 2428317; Fax: +91 - 422 2422 387

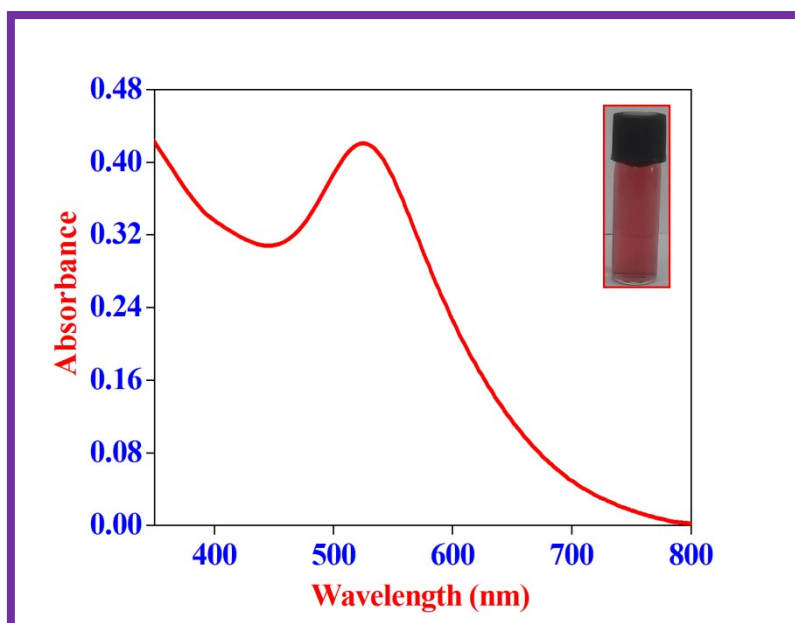

**Fig. S1.** Absorption spectrum of  $\beta$ -CD AuNPs and inset shows corresponding photograph.

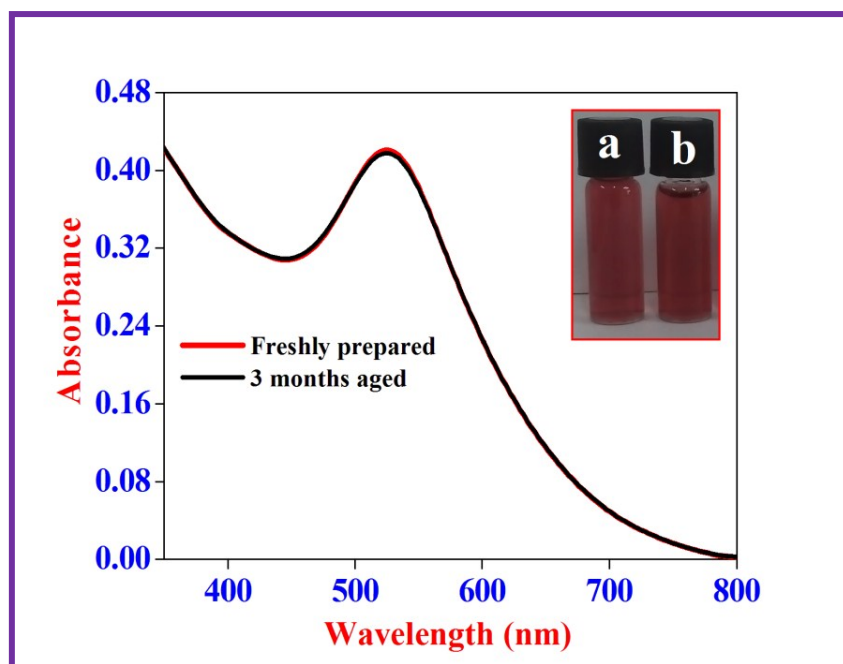

**Fig. S2.** Absorption spectra of freshly prepared and three months aged  $\beta$ -CD AuNPs and inset shows corresponding photographs of (a) freshly prepared and (b) three months aged  $\beta$ -CD AuNPs.

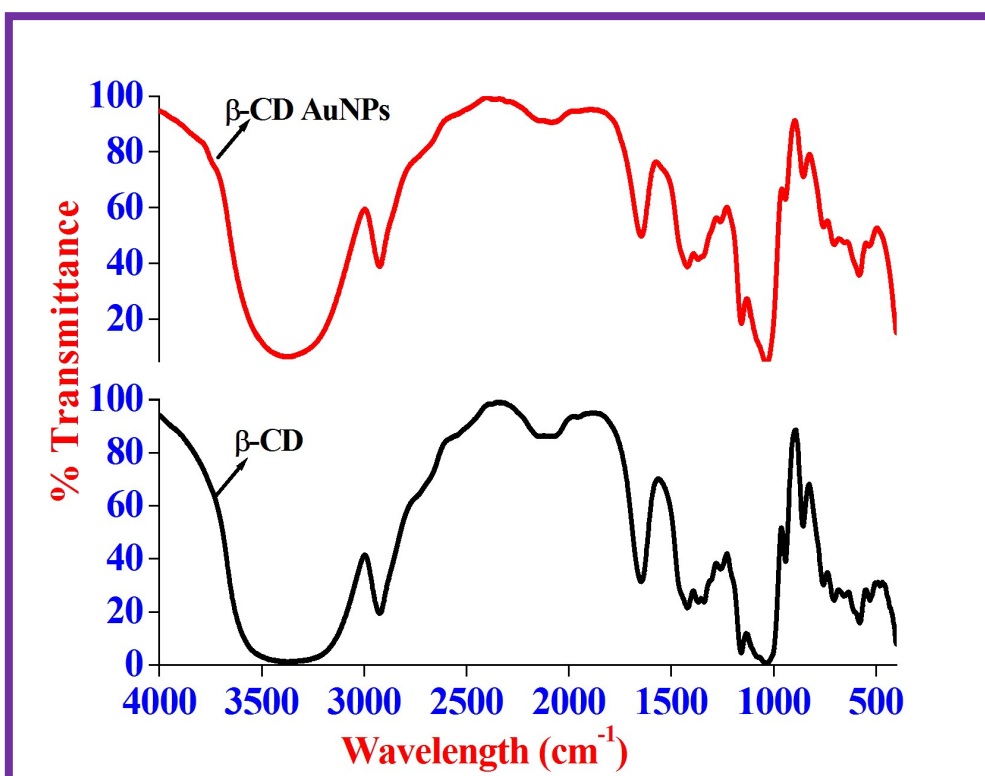

Fig. S3. FT-IR spectra of pristine  $\beta$ -CD and  $\beta$ -CD AuNPs.

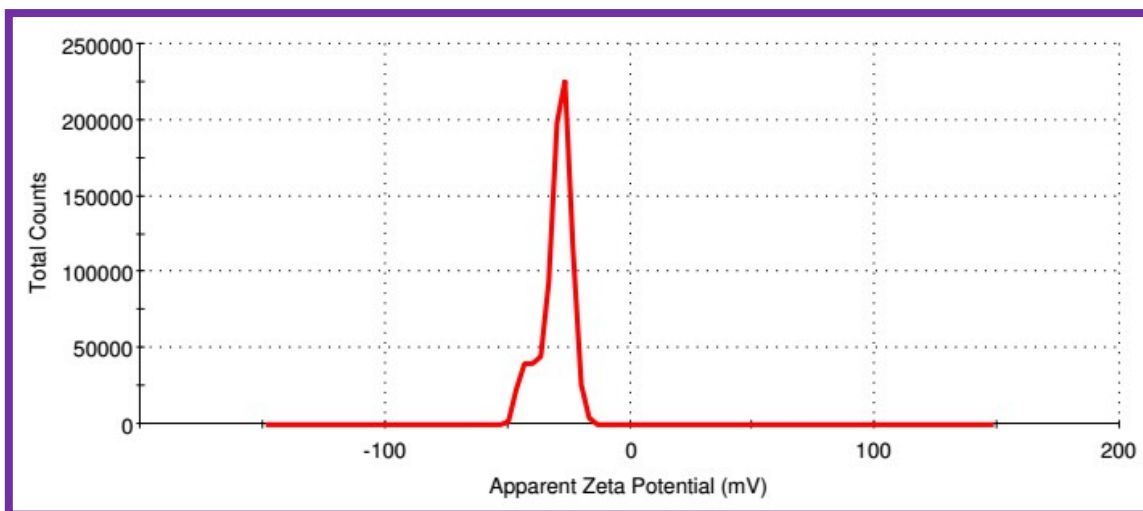

Fig. S4. Zeta potential result of  $\beta$ -CD AuNPs.

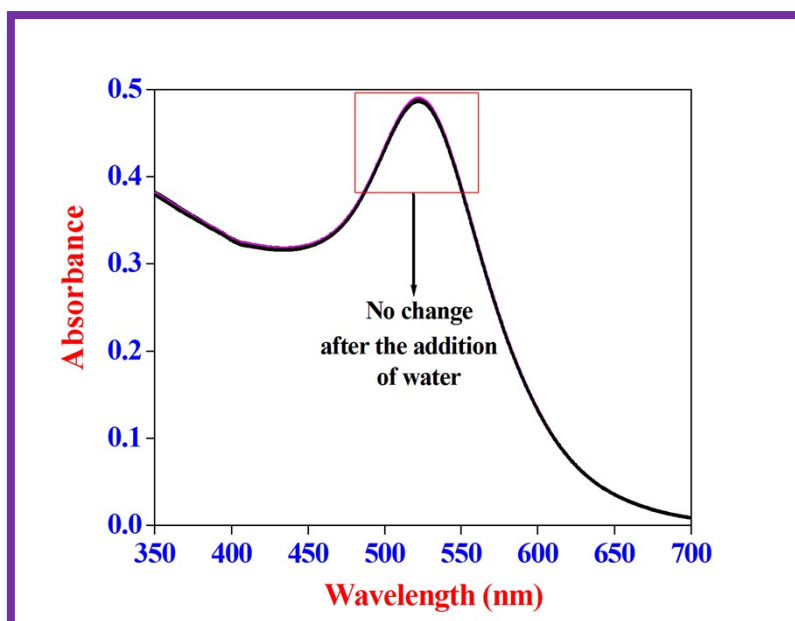

**Fig. S5.** Absorption spectra of  $\beta$ -CD AuNPs after the addition of different amounts of water.

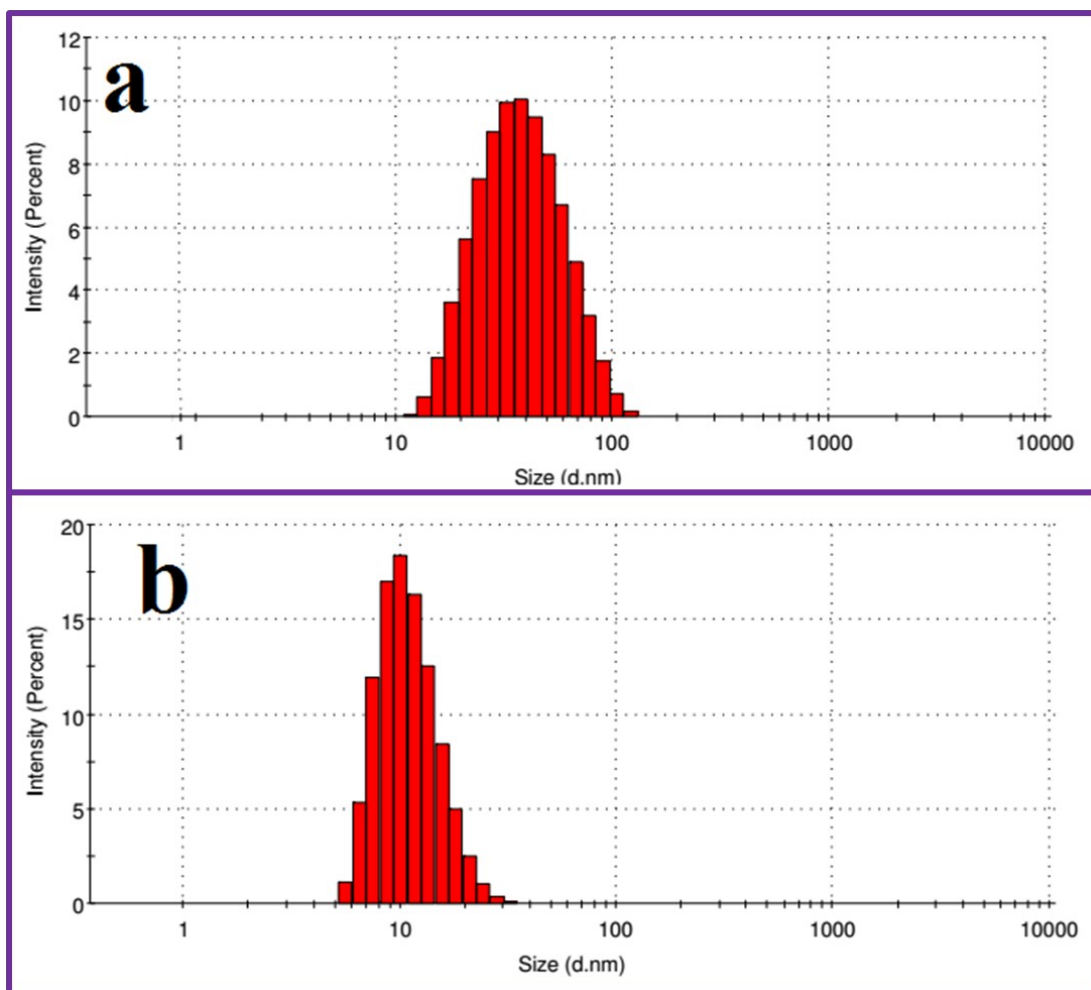

**Fig. S6.** DLS observations for  $\beta$ -CD AuNPs before and after the addition of  $\text{CN}^-$  ions.

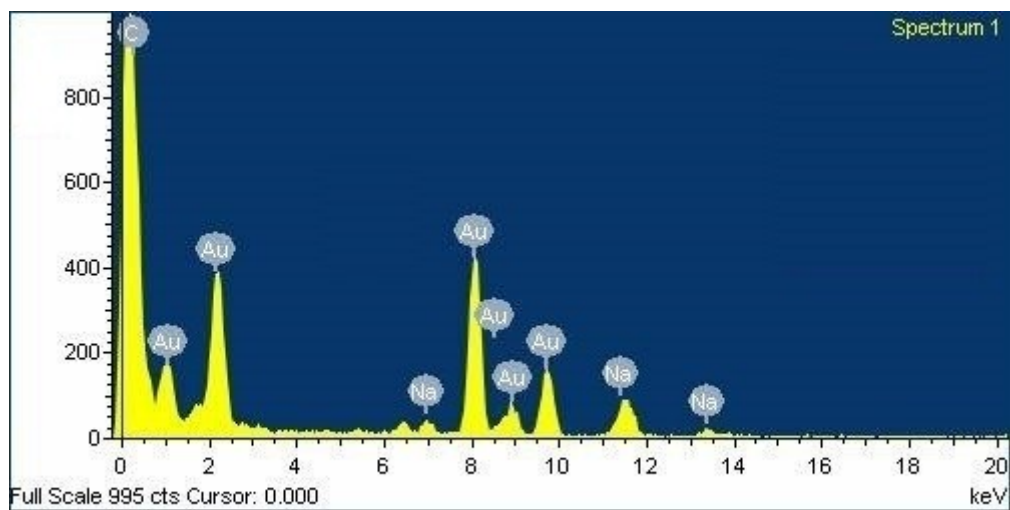

**Fig. S7.** EDX spectrum of  $\beta$ -CD AuNPs embedded cotton swab.



**Table S1.** Comparison of various nanomaterials based optical methods for CN<sup>-</sup> ions with present analytical methodology.

| <b>Method</b> | <b>Nanoprobe</b>                         | <b>Linear range</b>      | <b>LOD</b>         | <b>Reference</b> |
|---------------|------------------------------------------|--------------------------|--------------------|------------------|
| Fluorescence  | Lysozyme stabilized AuNCs                | 5-120 $\mu\text{M}$      | 0.19 $\mu\text{M}$ | 11               |
| Fluorescence  | Rhodamine B- adsorbed AuNPs              | 0.15-45 $\mu\text{M}$    | 80 nM              | 12               |
| Fluorescence  | CdSe QDs                                 | ---                      | 1.1 $\mu\text{M}$  | 13               |
| Fluorescence  | Au nanodots                              | 0.29-8.87 $\mu\text{M}$  | 0.15 $\mu\text{M}$ | 41               |
| Fluorescence  | Bovine serum albumin stabilized Ce/AuNCs | 0.1-15 $\mu\text{M}$     | 0.05 $\mu\text{M}$ | 42               |
| Fluorescence  | Polymer-coated AuNPs                     | 3-930 $\mu\text{M}$      | 3 $\mu\text{M}$    | 43               |
| Fluorescence  | OVA-AuNCs                                | 0.5-7.5 $\mu\text{M}$    | 68 nM              | 44               |
| Colorimetry   | Ag@Au core-shell NPs                     | 0.4-32 $\mu\text{M}$     | 0.18 $\mu\text{M}$ | 16               |
| Colorimetry   | Au@Ag core/shell NPs                     | 8-80 $\mu\text{M}$       | 0.4 $\mu\text{M}$  | 45               |
| Colorimetry   | AgNPs                                    | 16.7-133.3 $\mu\text{M}$ | 1.8 $\mu\text{M}$  | 46               |
| Colorimetry   | AuNPs                                    | ---                      | 14 $\mu\text{M}$   | 47               |
| Colorimetry   | PS20-AuNPs                               | 0-7 $\mu\text{M}$        | 100 nM             | 48               |
| Colorimetry   | $\beta$ -CD AuNPs                        | 4.5-99 $\mu\text{M}$     | 93 nM              | This work        |
